# Supplementary material
Source: PubMed Central journal article supplement (PMC9649879)

(A)

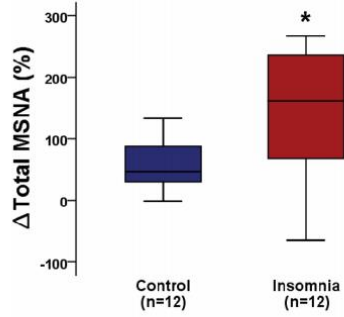

(B)

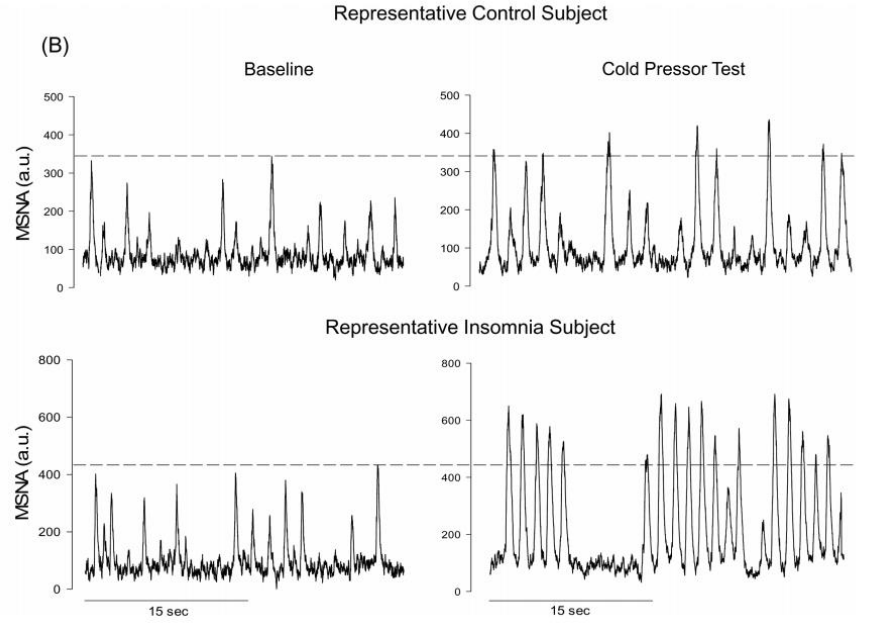

Supplement: NIHMS1834739-supplement-Related_Manuscript_File.pdf [file NIHMS1834739-supplement-Related_Manuscript_File.pdf]
